# Supplementary material
Source: Royal Society of Chemistry journal article supplement (doi:10.1039/d6ta01643j)
Supplement: d6ta01643j1.pdf [file d6ta01643j1.pdf]

## Supporting Information

Synthesis of Si nanoparticles (80%-SiNPs). To highlight the critical role of the CNT template, a control sample of 80%-SiNPs was synthesized under similar conditions to SiNPs but add 20% CNTs.

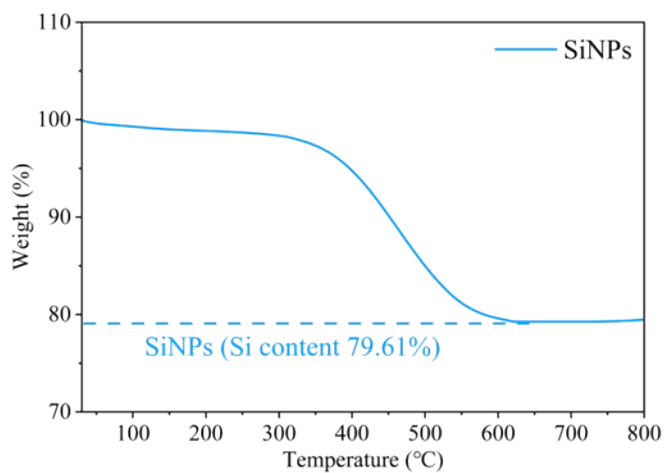

Figure S1 TGA curves of 20%-SiNPs.

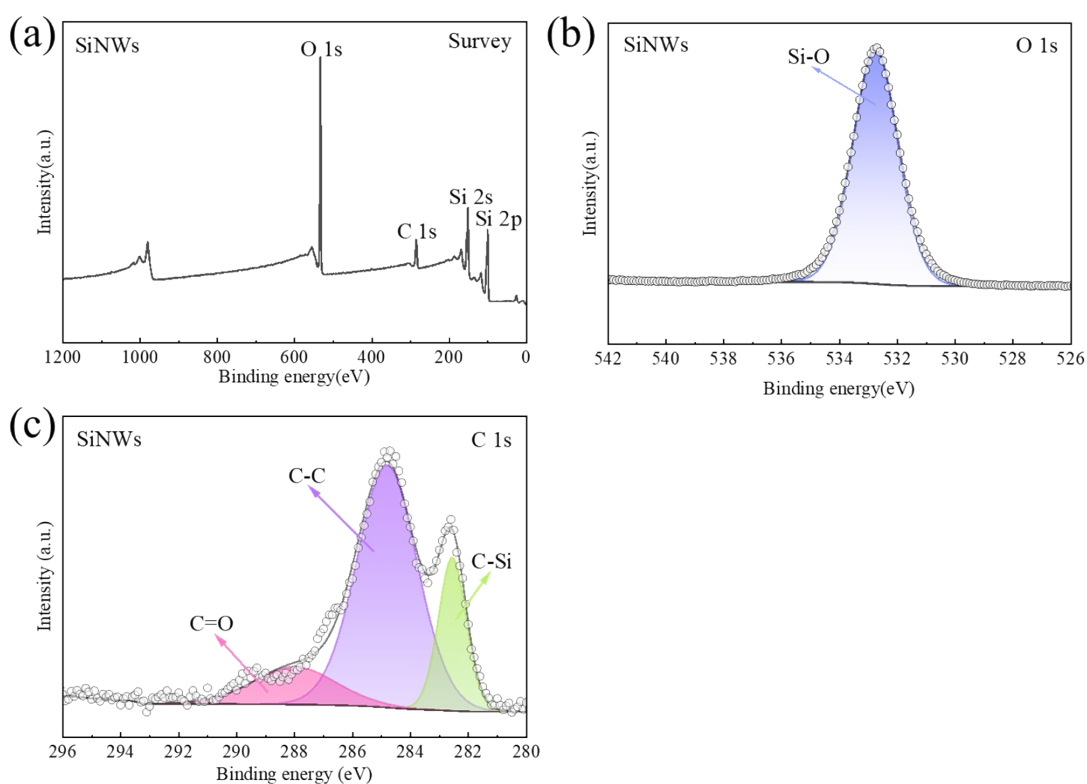

Figure S2. (a) Survey, (b) O 1s and (c) C 1s XPS spectra of SiNWs.

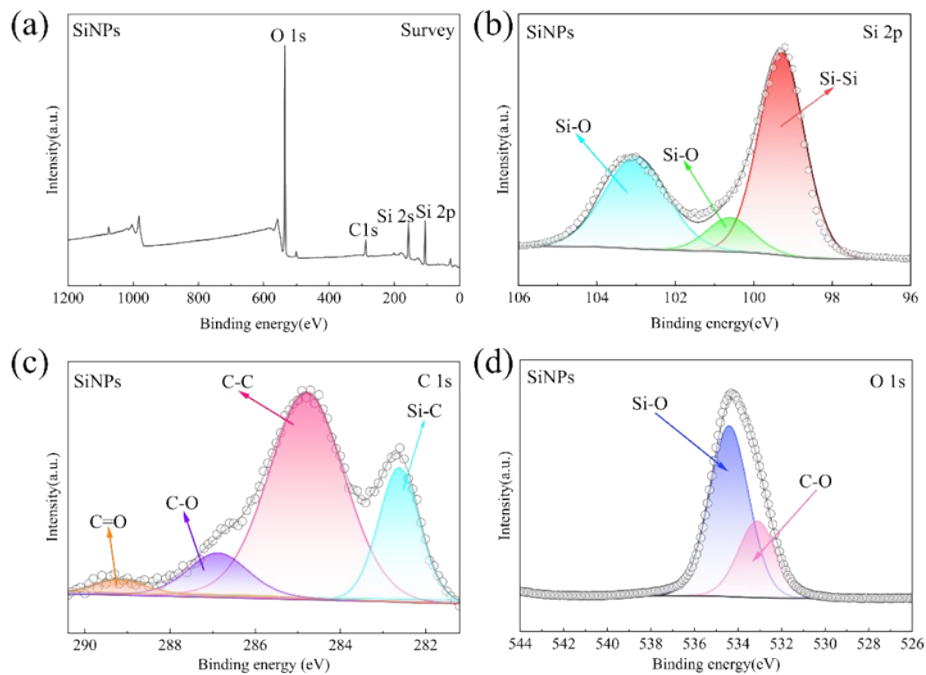

Figure S3 Si 2p, C1s, O1s XPS spectra of 20%-SiNPs.

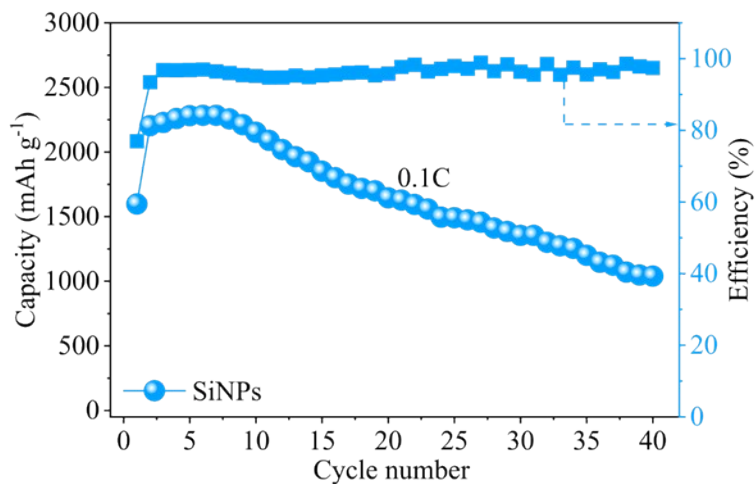

Figure S4 Cycling performances of Li/ 20%-SiNPs cells

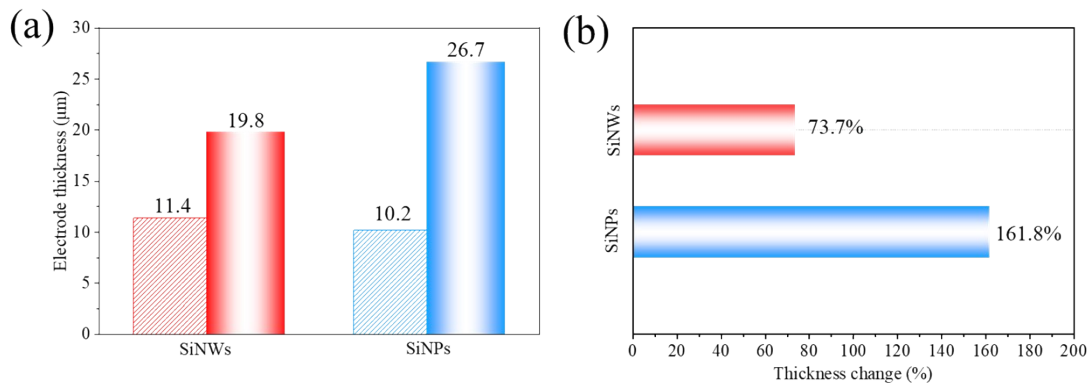

Figure S5. (a) Volume expansion of SiNWs and SiNPs before and after cycling; (b) Percentage of volume expansion after cycling.

Table S1 Comparison chart of the as-prepared SiNWs with other silicon nanowires.

| Method                                               | Sample                          | Discharge capacity (mAh g <sup>-1</sup> )/Cycle numbers | Cycle retention | Potential range (V) | Current density (mA g <sup>-1</sup> ) |
|------------------------------------------------------|---------------------------------|---------------------------------------------------------|-----------------|---------------------|---------------------------------------|
| MACE                                                 | Ag-coated SiNW[40]              | 707/30                                                  | \               | 0.01-1 V            | 500                                   |
| CVD                                                  | 37 nm-SiGt[41]                  | 900/125                                                 | 85%             | 0.01-1 V            | 200                                   |
| CVD                                                  | 30 nm UTSiNW[42]                | 933.1/50                                                | 87.5%           | 0.01-1.5 V          | 300                                   |
| New bi-metal-assisted chemical etching process.      | CNTs@SiO <sub>2</sub> /Si@C[43] | 960/100                                                 | 89.8%           | 0.01-3.0 V          | 200                                   |
| Sol-gel method and magnesiothermic reduction process | SC-3[44]                        | 745.8/100                                               | 91.3 %          | 0.001-2 V           | 500                                   |
| CVD                                                  | Si wires[45]                    | 710.2/100                                               | 24.9%           | 0.01-1.5 V          | 100                                   |
| Molten salt electrolysis                             | SiNWs/G[46]                     | 608.5/100                                               | 90.04%          |                     | 500                                   |
| Molten salt electrolysis                             | SC650[47]                       | 594/100                                                 | 90.38%          | 0.01-1.50 V         | 65                                    |
| Sol-gel method and magnesiothermic reduction process | SiNWs(This work)                | 1480.2/100                                              | 70.81%          | 0.005-2V            | 200                                   |
| Sol-gel method and magnesiothermic reduction process | SiNWs(This work)                | 997.3/200                                               | 47.71%          | 0.005-2V            | 200                                   |
